# Supplementary material
Source: HighWire-hosted journal article supplement (http://www.qdcxjkg.com/highwire/filestream/113724/field_highwire_adjunct_files/0/Supplementary_bibliography.pdf)
Supplement: Supplementary_bibliography.pdf [file Supplementary_bibliography.pdf]

## **Braun et al. Supplementary bibliography**

1. Wilson MG, Edwards DJ (1922) Diagnostic Value of Determining Vital Capacity of Lungs of Children. *JAMA* 78: 1107-1110.
2. Foster JH, Hsieh PL (1923) The vital capacity of the Chinese: An occupational study. *Arch Int Med* 32: 335- 342.
3. Foster JH (1924) A study of the vital capacity in Chinese. *Chinese Med J* 38: 285-294.
4. Smillie WG, Augustine DL (1926) Vital capacity of Negro race. *JAMA* 87: 2055-2058.
5. Roberts FL, Crabtree JA (1927) The vital capacity of the Negro child. *JAMA* 88: 1950- 1952.
6. McCloy CH (1927) Vital capacity of Chinese students. *Arch Int Med* 40: 686- 700.
7. Bhatia SL (1929) The vital capacity of the lungs. *Indian Med Gazette* 64: 519-521.
8. Mason ED (1930) The vital capacity of the lungs in South Indian women. *Trans Eighth Congress of Far Eastern Association of Tropical Medicine* 262- 269.
9. Mukherjee HN, Gupta PC (1931) The basal metabolism of Indians (Bengalis). *Indian J Med Res* 18: 807-812.
10. Mason ED (1932) Standards for predicting the normal vital capacity of the lungs in South Indian women from height, weight and surface area. *Indian J Med Res* 20: 117-134.
11. Krishnan BT, Vareed C (1932) The vital capacity of 103 Male medical students in South India. *Indian J Med Res* 19: 1165- 1183.
12. Hurtado A (1932) Respiratory adaptation in the Indian natives of the Peruvian Andes. *Studies at high altitude. Am J Phys Anthro* 17: 137- 165.
13. Krishnan BT, Vareed C (1933) A further study on the vital capacity of South Indians. *Indian J Med Res* 21: 131- 140.
14. Tsai C, Wu CH (1939) A statistical study of the vital capacity of senior middle school and college students. *Chinese J Physio* 14: 95- 116.
15. Telang DM, Bhagwat GA (1941) Studies in the vital capacity of Bombay medical students *Indian J Med Res* 29: 723- 750.
16. Reddy DVS, Sastry PB (1944) Studies in vital capacity. *Indian J Med Res* 32: 237-246.
17. Koch ACE (1954) The vital capacity of university students. *Ceylon J Med Sci* 8: 203-209.
18. Peng M-T, Lin C-C (1959) Lung volume and its subdivisions of normal Chinese male. *JFMPA* 59: 21- 27.
19. Glass WI (1962) Ventilatory function differences between Polynesian and European rope workers. *NZ Med J* 61: 433- 444.
20. Chiang ST, Chen JYH (1962) Total lung capacity among healthy Chinese adult males. *The Journal - Lancet* 82: 330- 334.
21. Kasliwal RM, Baldwa VS, Sharma PR (1964) Ventilatory tests and lung volume studies in health. *J Indian Med Assoc* 43: 49- 51.
22. Abramowitz S, Leiner GC, Lewis WA, Small MJ (1964) Vital capacity in the Negro. *Am Rev Respir Dis* 92: 287- 292.
23. Coates EO, Bower GC, Reinstein N (1965) Chronic Respiratory Disease in Postal Employees. *JAMA* 191: 161- 166.

24. Cotes JE, Ward MP (1966) Ventilatory capacity in normal Bhutanese. *J Physio* 186: 88-89.
25. Bhattacharya AK, Banerjee S (1966) Vital capacity in children and young adults of India. *Indian J Med Res* 54: 62- 70.
26. Damon A (1966) Negro-white differences in pulmonary function (vital capacity, timed vital capacity, and expiratory flow rate). *Hum Biol* 38: 381-393.
27. Kamat SR, Thiruvengadam KV (1967) A study of pulmonary function among Indians and assessment of the Wright peak flow meter in relation to spirometry for field use. *Am Rev of Resp Dis* 96: 707- 716.
28. Huizinga J, Glanville EV (1968) Vital capacity and timed vital capacity in the Kurumba from upper volta. *S Afr J Sci* 64: 125- 133.
29. Chan KY, A. R (1968) The vital capacity of 137 Malaysians 15 to 37 years old. *The Med J Malaya* 23: 86- 91.
30. Mathur KS, Nigam DK, Garg RK (1968) Pulmonary function studies in normal healthy persons. *Indian J Chest Dis* 10: 80- 89.
31. Beaudry PH (1968) Pulmonary function survey of the Canadian Eastern Arctic Eskimo. *Arch Environ Health* 17: 524-528.
32. Hearn CE (1968) Bagassosis: an epidemiological, environmental, and clinical survey. *Br J Ind Med* 25: 267-282.
33. Johannsen ZM, Erasmus LD (1968) Clinical spirometry in normal Bantu. *Am Rev Respir Dis* 97: 585-597.
34. Harrison GA, Kuchemann CF, Moore MAS, Boyce AJ, Baju T, et al. (1969) The effects of altitudinal variation in Ethiopian populations. *Philos Trans R Soc Lond Series B, Biol Sci* 256: 147- 182.
35. Jain SK, Ramiah TJ (1969) Normal standards of pulmonary function tests for healthy Indian men 15-40 years old: comparison of different regression equations (prediction formulae). *Indian J Med Res* 57: 1453-1466.
36. Densen PM, Jones EW, Bass HE, Breuer J, Reed E (1969) A survey of respiratory disease among New York City postal and transit workers. 2. Ventilatory function test results. *Environ Res* 2: 277-296.
37. Chuan PS, Chia M (1969) Respiratory function tests in normal adult Chinese in Singapore. *Singapore Med J* 10: 265-271.
38. Miller GJ, Ashcroft MT, Swan AV, Beadnell HM (1970) Ethnic variation in forced expiratory volume and forced vital capacity of African and Indian adults in Guyana. *Am Rev Respir Dis* 102: 979-981.
39. Elebute EA, Femi-Pearse D (1971) Peak flow rate in Nigeria: anthropometric determinants and usefulness in assessment of ventilatory function. *Thorax* 26: 597-601.
40. Dugdale AE, Bolton JM, Ganendran A (1971) Respiratory function among Malaysian aboriginals. *Thorax* 26: 740-743.
41. Femi-Pearse D, Elebute EA (1971) Ventilatory function in healthy adult Nigerians. *Clin Sci* 41: 203-211.
42. da Costa JL (1971) Pulmonary function studies in healthy Chinese adults in Singapore. *Am Rev Respir Dis* 104: 128-131.

43. van de Wal BW, Erasmus LD, Hechter R (1971) Stem and standing heights in Bantu and white South Africans: their significance in relation to pulmonary function values. *S Afr Med J* 45: 568-570.
44. Edwards RHT, Miller GJ, Hearn CED, Cotes JE (1972) Pulmonary function and exercise responses in relation to body composition and ethnic origin in Trinidadian males. *Proc Roy Soc B: Biological Sciences* 181: 407- 420.
45. Schlesinger Z, Goldbourt U, Medalie JH, Riss E, Neufeld HN, et al. (1972) Pulmonary function and respiratory disease among adult male Israelis. *Isr Med Sci* 8: 957- 964.
46. Oscherwitz M, Edlavitch SA, Baker TR, Jarboe T (1972) Differences in pulmonary functions in various racial groups. *Am J Epidemiol* 96: 319-327.
47. Woolcock AJ, Colman MH, Blackburn CR (1972) Factors affecting normal values for ventilatory lung function. *Am Rev Respir Dis* 106: 692-709.
48. Malik MA, Moss E, Lee WR (1972) Prediction values for the ventilatory capacity in male West Pakistani workers in the United Kingdom. *Thorax* 27: 611-619.
49. Miller GJ, Cotes JE, Hall AM, Salvosa CB, Ashworth A (1972) Lung function and exercise performance of healthy Caribbean men and women of African ethnic origin. *Q J Exp Physiol Cogn Med Sci* 57: 325-341.
50. Yokoyama T, Mitsufuji M (1972) Statistical representation of the ventilatory capacity of 2,247 healthy Japanese adults. *Chest* 61: 655-661.
51. Chehreh MN, Young RC, Jr., Viaene H, Ross CW, Scott RB (1973) Spirometric standards for healthy inner-city black children. *Am J Dis Child* 126: 159-163.
52. Stebbings JH, Jr. (1973) A survey of respiratory disease among New York City postal and transit workers. IV. Racial differences in the FEV 1. *Environ Res* 6: 147-158.
53. Cotes JE, Saunders MJ, Adam JE, Anderson HR, Hall AM (1973) Lung function in coastal and highland New Guineans--comparison with Europeans. *Thorax* 28: 320-330.
54. Joshi RC, Madan RN, Eggleston FC (1973) Clinical spirometry in normal North Indian males. *Respiration* 30: 39-47.
55. Rode A, Shephard RJ (1973) Pulmonary function of Canadian Eskimos. *Scand J Respir Dis* 54: 191-205.
56. Raven PB, Taguchi S, Drinkwater BL, Kaneko M, Horvath SM, et al. (1974) Anthropometric, spirometric, and physiologic comparisons of migrant Japanese. *Hum Biol* 46: 483- 494.
57. Seltzer CC, Siegelau AB, Friedman GD, Collen MF (1974) Differences in pulmonary function related to smoking habits and race. *Am Rev Respir Dis* 110: 598-608.
58. Cotes JE, Anderson HR, Patrick JM (1974) Lung function and the response to exercise in the New Guineans: role of genetic and environmental factors. *Philos Trans R Soc Lond B Biol Sci* 268: 349-361.
59. Sluis-Cremer GK (1974) Factors that influence simple lung function tests with special reference to ethnic factors. *Proc Mine Med Off Assoc SA* 54: 15-20.
60. Rossiter CE, Weill H (1974) Ethnic differences in lung function: evidence for proportional differences. *Int J Epidemiol* 3: 55-61.
61. Lapp NL, Amandus HE, Hall R, Morgan WK (1974) Lung volumes and flow rates in black and white subjects. *Thorax* 29: 185-188.
62. Boyce AJ, Haight JS, Rimmer DB, Harrison GA (1974) Respiratory function in Peruvian Quechua Indians. *Ann Hum Biol* 1: 137-148.

63. Cotes JE, Dabbs JM, Hall AM, Lakhera SC, Saunders MJ, et al. (1975) Lung function of healthy young men in India: contributory roles of genetic and environmental factors. *Proc Roy Soc B* 191: 413- 425.
64. Montgomery CH, Snyder HB (1975) Pulmonary evaluation of sandblasters. *J Occup Med* 17: 523-527.
65. de Hamel FA, Glass WJ (1975) Observations on Maori-European lung function differences. *Aust N Z J Med* 5: 44-48.
66. Chetty A, Ghai OP, Guleria JS (1975) Pulmonary function studies in normal children. *Indian Pediatr* 12: 647-651.
67. Onn ZK, Kee CP (1976) Ventilatory function in normal industrial Malay workers in Singapore. *Singapore Med J* 17: 242- 247.
68. Binder RE, Mitchell CA, Schoenberg JB, Bouhuys A (1976) Lung function among black and white children. *Am Rev Respir Dis* 114: 955-959.
69. Cookson JB, Blake GT, Faranisi C (1976) Normal values for ventilatory function in Rhodesian Africans. *Br J Dis Chest* 70: 107-111.
70. Stinson JM, Hill BE (1976) Positive screening spirometry and follow-up in a specified population. *J Natl Med Assoc* 68: 26-27.
71. Patrick JM (1976) Respiratory responses to CO<sub>2</sub>-rebreathing in Nigerian men. *Q J Exper Physio* 61: 85-93.
72. Jones PRM, Baber FM, Heywood C, Cotes JE (1977) Ventilatory capacity in healthy Chinese children: Relation to habitual activity. *Ann Hum Bio* 4: 155- 161.
73. Kamat SR, Sarma BS, Raju VRK, Venkataraman C, Balkrishna M, et al. (1977) Indian norms for pulmonary function. *J Assoc Phys India* 25: 531- 540.
74. Mustafa KY (1977) Spirometric lung function tests in normal men and African ethnic origin. *Am Rev Respir Dis* 116: 209-213.
75. Ching B, Horsfall PA (1977) Lung volumes in normal Cantonese subjects: preliminary studies. *Thorax* 32: 352-355.
76. Miller GJ, Saunders MJ, Gilson RJ, Ashcroft MT (1977) Lung function of healthy boys and girls in Jamaica in relation to ethnic composition, test exercise performance, and habitual physical activity. *Thorax* 32: 486-496.
77. Duncan MT, Scammell CA (1977) Physical work capacity and pulmonary function of Malaysian adolescent females. *Hum Biol* 49: 31-40.
78. Brody JS, Lahiri S, Simpser M, Motoyama EK, Velasquez T (1977) Lung elasticity and airway dynamics in Peruvian natives to high altitude. *J Appl Physiol* 42: 245-251.
79. Brown P, Sadowsky D, Gajdusek DC (1978) Ventilatory lung function studies in Pacific Island Micronesians. *Am J Epidemiol* 108: 259-265.
80. Schoenberg JB, Beck GJ, Bouhuys A (1978) Growth and decay of pulmonary function in healthy blacks and whites. *Respir Physiol* 33: 367-393.
81. Benatar SR (1978) Pulmonary function in normal children aged 11-15 years. *S Afr Med J* 53: 543-546.
82. Lanese RR, Keller MD, Foley MF, Underwood EH (1978) Differences in pulmonary function tests among whites, blacks, and American Indians in a textile company. *J Occup Med* 20: 39-44.
83. Williams DE, Miller RD, Taylor WF (1978) Pulmonary function studies in healthy Pakistani adults. *Thorax* 33: 243-249.

84. Hsu KH, Jenkins DE, Hsi BP, Bourhofer E, Thompson V, et al. (1979) Ventilatory functions of normal children and young adults--Mexican-American, white, and black. I. Spirometry. *J Pediatr* 95: 14-23.
85. Onadeko BO, Iyun AA, Sofowora EO, Adamu SO (1979) Ventilatory function in normal Nigerian school children. *Afr J Med Med Sci* 8: 25-29.
86. Chandler D, Dugdale AE (1979) Respiratory function in aboriginal school children. *Med J Aust* 1: 10-12.
87. Corey PN, Ashley MJ, Chan-Yeung M (1979) Racial differences in lung function: search for proportional relationships. *J Occup Med* 21: 395-398.
88. Hackett PH, Reeves JT, Reeves CD, Grover RF, Rennie D (1980) Control of breathing in Sherpas at low and high altitude. *J App Physio* 49: 374- 379.
89. Eng NT, Chan LK, Vellayappan, K, Boon, WH, Heng, WP (1980) Ventilatory functions of normal Singapore Chinese children – I: Spirometry. *J Sing Paed Soc* 22: 1-4.
90. Sliman NA, Dajani BM, Dajani HM (1981) Ventilatory function test values of healthy adult Jordanians. *Thorax* 36: 546- 549.
91. Boggs PB, Stephens AL, Walker RF, Vekovius WA, Acton GS, et al. (1981) Racially specific reference standards for commonly performed spirometric measurements for black and white children, ages 9-18 years. *Ann Allergy* 47: 273-277.
92. Melville GN, Kumar M, Ismail S, Sealy C, Wray SR (1981) Pulmonary function in Afro-Jamaicans. Implications in screening. *West Indian Med J* 30: 119-123.
93. Stinson JM, McPherson GL, Hicks K, Scott V, Sykes R, et al. (1981) Spirometric standards for healthy black adults. *J Natl Med Assoc* 73: 729-733.
94. Ghesquiere JL, Karvonen MJ (1981) Some anthropometric and functional dimensions of the pygmy (Kivu Twa). *Ann Hum Biol* 8: 119-134.
95. Kamat SR, Tyagi NK, Rashid SSA (1982) Lung function in Indian adult subjects. *Lung India* 1: 11- 21.
96. Ahuja GK, Ahuja IS (1982) Ventilatory pulmonary function tests in normal Nigerian young adult males. *East Afr Med J* 59: 652- 657.
97. Lam KK, Pang SC, Allan WG, Hill LE, Snell NJ, et al. (1982) A survey of ventilatory capacity in Chinese subjects in Hong Kong. *Ann Hum Biol* 9: 459-472.
98. Wall MA, Olson D, Bonn BA, Creelman T, Buist AS (1982) Lung function in North American Indian children: reference standards for spirometry, maximal expiratory flow volume curves, and peak expiratory flow. *Am Rev Respir Dis* 125: 158-162.
99. Ahuja GK, Ahuja IS (1983) A comparative study of ventilatory pulmonary function tests in health and disease in Nigerian males. *West Afr J Med* 2: 61- 65.
100. Dockery DW, Berkey CS, Ware JH, Speizer FE, Ferris BGJ (1983) Distribution of forced vital capacity and forced expiratory volume in one second in children 6 to 11 years of age. *Am Rev Resp Dis* 128: 405- 412.
101. Ali Ma (1983) Ventilatory functions in non-smoking healthy Nigerian adults. *West Afr J Med* 2: 1- 8.
102. Oduwole O, Aderele WI, Tweedie MC (1983) Ventilatory capacity in Nigerian school children. *Ann Trop Paed* 3: 103- 109.
103. de Hamel FA, Welford B (1983) Lung function in Maoris and Samoans working in New Zealand. *N Z Med J* 96: 560-562.

104. Hsi BP, Hsu KH, Jenkins DE (1983) Ventilatory functions of normal children and young adults: Mexican-American, white, and black. III. Sitting height as a predictor. *J Pediatr* 102: 860-865.
105. Lakhera SC, Mathew L, Rastogi SK, Gupta JS (1984) Pulmonary function of Indian athletes and sportsmen. Comparison with American athletes. *Indian J Physio Pharm* 28: 187- 194.
106. Faris R, Hegazy N, Massoud AA (1984) Normal values of ventilatory lung function. *Resp News Bull* 26: 8-10.
107. Strope GL, Helms RW (1984) A longitudinal study of spirometry in young black and young white children. *Am Rev Respir Dis* 130: 1100-1107.
108. Myers JE (1984) Differential ethnic standards for lung functions, or one standard for all? *S Afr Med J* 65: 768-772.
109. Huang SY, White DP, Douglas NJ, Moore LG, McCullough RE, et al. (1984) Respiratory function in normal Chinese: comparison with Caucasians. *Respiration* 46: 265-271.
110. Petersen M, Hankinson J (1985) Spirometry reference values for nonexposed blue-collar workers. *J Occup Med* 27: 644-650.
111. Mengesha YA, Mekonnen Y (1985) Spirometric lung function tests in normal non-smoking Ethiopian men and women. *Thorax* 40: 465-468.
112. Goren AI, Bruderman I (1986) Pulmonary functions and respiratory symptoms and diseases among adult Israelis. *Isr J Med Sci* 22: 761- 765.
113. Patrick JM, Patel A (1986) Ethnic differences in the growth of lung function in children: a cross-sectional study in inner-city Nottingham. *Ann Hum Biol* 13: 307-315.
114. Watson DS, Watson RM, Siskind V (1986) Respiratory function in aboriginal children. *Med J Aust* 144 Suppl: S11-13.
115. Rosentswieg J, Brewer V, Tate J, Love P (1986) Pulmonary responses of black and white females. *J Sports Med Phys Fitness* 26: 346-349.
116. Massey DG, Fournier-Massey G (1986) Japanese-American pulmonary reference values: influence of environment on anthropology and physiology. *Environ Res* 39: 418-433.
117. Udwardia FE, Sunavala JD, Shetye VM (1987) Lung function studies in healthy Indian subjects. *J Assoc Phys India* 36: 491- 496.
118. Greksa LP, Spielvogel H, Caceres E, Paredes-Fernandez L (1987) Lung function of young Aymara highlanders. *Ann Hum Biol* 14: 533-542.
119. Cerny FJ (1987) Breathing pattern during exercise in young black and Caucasian subjects. *J Appl Physiol* 62: 2220-2223.
120. Asher MI, Douglas C, Stewart AW, Quinn JP, Hill PM (1987) Lung volumes in Polynesian children. *Am Rev Respir Dis* 136: 1360-1365.
121. Johnston ID, Bland JM, Anderson HR (1987) Ethnic variation in respiratory morbidity and lung function in childhood. *Thorax* 42: 542-548.
122. Ayub M, Zaidi SH, Burki NK (1987) Spirometry and flow-volume curves in healthy, normal Pakistanis. *Br J Dis Chest* 81: 35-44.
123. Chatterjee S, Saha D, Chatterjee BP (1988) Pulmonary function studies in healthy non-smoking men of Calcutta. *Ann Hum Bio* 15: 365- 374
124. Schwartz J, Katz SA, Fegley RW, Tockman MS (1988) Sex and race differences in the development of lung function. *Am Rev Respir Dis* 138: 1415-1421.

125. Schwartz JD, Katz SA, Fegley RW, Tockman MS (1988) Analysis of spirometric data from a national sample of healthy 6- to 24-year-olds (NHANES II). *Am Rev Respir Dis* 138: 1405-1414.
126. Coultas DB, Howard CA, Skipper BJ, Samet JM (1988) Spirometric prediction equations for Hispanic children and adults in New Mexico. *Am Rev Respir Dis* 138: 1386-1392.
127. Crapo RO, Lockey J, Aldrich V, Jensen RL, Elliott CG (1988) Normal spirometric values in healthy American Indians. *J Occup Med* 30: 556-560.
128. Bibi H, Goldsmith JR, Vardi H (1988) Racial or ethnic variation in spirometric lung function norms. Recommendations based on study of Ethiopian Jews. *Chest* 93: 1026-1030.
129. De Kock MA, Swiegers WR, Kotze TJ, Joubert G (1988) Cross-sectional study of uranium mine workers to develop predictive equations for lung functions with reference to chronic obstructive pulmonary disease. *S Afr Med J Suppl*: 1-20.
130. Greksa LP, Spielvogel H, Paz-Zamora M, Caceres E, Paredes-Fernandez L (1988) Effect of altitude on the lung function of high altitude residents of European ancestry. *Am J Phys Anthropol* 75: 77-85.
131. Marcus EB, MacLean CJ, Curb JD, Johnson LR, Vollmer WM, et al. (1988) Reference values for FEV1 in Japanese-American men from 45 to 68 years of age. *Am Rev Respir Dis* 138: 1393-1397.
132. Neukirch F, Chansin R, Liard R, Levallois M, Leproux P (1988) Spirometry and maximal expiratory flow-volume curve reference standards for Polynesian, European, and Chinese teenagers. *Chest* 94: 792-798.
133. Chia SE, Hoe SY (1988) Ventilatory function in Malay female workers in Singapore. *Ann Acad Med Singapore* 17: 443-446.
134. Purohit SD, Srivastava AB, Gupta PR, Gupta SD, Mathur BB, et al. (1989) Spirometric norms in healthy adults of Rajasthan. *Lung India* 7: 9- 14.
135. Singh R, Singh HJ, Sirisinghe RG (1989) Cardiopulmonary fitness in a sample of Malaysian population. *Jpn J Physio* 39: 475- 485.
136. Coetzee AM, Becker PJ (1989) Lung function screening in industry. *S Afr Med J* 76: 550-553.
137. Hessel PA, Sluis-Cremer GK (1989) Prediction equations for lung function in black industrial workers at Palabora Mining Company. *S Afr Med J* 76: 548-549.
138. Dufetel P, Pigearias B, Lonsdorfer J, Derossi G, Diaine C, et al. (1989) Spirometric reference values in Senegalese black adults. *Eur Respir J* 2: 352-358.
139. Anyanwu CH, Umeh BU (1989) Ventilatory pulmonary function study in healthy young Nigerian adults. *Afr J Med Med Sci* 18: 257-262.
140. Wesley AG, Pather M, Becker P (1989) Normal values for simple lung function tests in South African Asian children. *Ann Trop Paed* 9: 70-74.
141. Vijayan VK, Kuppurao KV, Venkatesan P, Sankaran K, Prabhakar R (1990) Pulmonary function in health young adult Indians in Madras. *Thorax* 45: 611- 615.
142. Crapo RO, Jensen RL, Lockey JE, Aldrich V, Elliott CG (1990) Normal spirometric values in healthy Hispanic Americans. *Chest* 98: 1435-1439.
143. Mashalla YJ, Masesa PC, Veeneklaas RJ (1990) Predictions of normal forced vital capacity and forced expired volume in one second in Tanzanian children. *J UOEH* 12: 389-398.

144. Mathur N, Rastogi SK, Gupta BN, Husain T (1990) A global comparison of predicting equations on spirometry in the male population. *Int J Epidemiol* 19: 331-338.
145. Duncan MT, Husain R, Raman A, Cheah SH, Ch'ng SL (1990) Ventilatory function in Malay Muslims during normal activity and the Ramadan fast. *Singapore Med J* 31: 543-547.
146. Abid Ali M, Vahalia KV, Murtuza Ali M (1990) A study of respiratory function in normal schoolchildren in northern Nigeria. *Afr J Med Med Sci* 19: 207-212.
147. Rahman MA, Ullah MB, Begum A (1990) Lung function in teenage Bangladeshi boys and girls. *Respir Med* 84: 47-55.
148. Brown TP, Gamulega T (1991) Lung capacity of males from the Ok Tedi region, Western Province, Papua New Guinea. *P N G Med J* 34: 262-269.
149. Donnelly PM, Yang TS, Peat JK, Woolcock AJ (1991) What factors explain racial differences in lung volumes? *Eur Respir J* 4: 829-838.
150. Jaja SI (1991) Lung function in young Nigerian adults. *West Afr J Med* 10: 255-262.
151. Di Pede C, Viegi G, Quackenboss JJ, Boyer-Pfersdorf P, Lebowitz MD (1991) Respiratory symptoms and risk factors in an Arizona population sample of Anglo and Mexican-American whites. *Chest* 99: 916-922.
152. McDonnell WF, Seal E, Jr. (1991) Relationships between lung function and physical characteristics in young adult black and white males and females. *Eur Respir J* 4: 279-289.
153. Higgins M, Keller JB, Wagenknecht LE, Townsend MC, Sparrow D, et al. (1991) Pulmonary function and cardiovascular risk factor relationships in black and in white young men and women. The CARDIA Study. *Chest* 99: 315-322.
154. Olanrewaju DM (1991) Spirometric standards for healthy Nigerian children and adolescents. *East Afr Med J* 68: 812-819.
155. Shamssain MH, Thompson J (1992) A comparative study of pulmonary function and body composition in Scottish and Libyan schoolchildren aged 12-17 years. *J Trop Ped* 38: 121- 123.
156. Chinn S, Rona RJ (1992) Height and age adjustment for cross sectional studies of lung function in children aged 6-11 years. *Thorax* 47: 707-714.
157. Cookson JB, Pilane CN, Tembo PM (1992) Normal pulmonary function in Botswana. *Cent Afr J Med* 38: 238-239.
158. Gamsky TE, Schenker MB, McCurdy SA, Samuels SJ (1992) Smoking, respiratory symptoms, and pulmonary function among a population of Hispanic farmworkers. *Chest* 101: 1361-1368.
159. Thompson JE, Sleigh AC, Passey ME, Barnes A, Streatfield RW (1992) Ventilatory standards for clinically well aboriginal adults. *Med J Aust* 156: 566-569.
160. Singh R, Singh HJ, Sirisinghe RG (1992) Forced vital capacity in Malaysian females. *Jpn J Physiol* 42: 407-414.
161. Kumar A, Pannu BK, Manchanda KC, Singh KD, Lehal SS (1992) Pulmonary function tests in healthy male Punjabi children [10-19 years of age]. *Indian J Chest Dis Allied Sci* 34: 191-195.
162. Jacobs DR, Jr., Nelson ET, Dontas AS, Keller J, Slattery ML, et al. (1992) Are race and sex differences in lung function explained by frame size? The CARDIA Study. *Am Rev Respir Dis* 146: 644-649.



163. Roizin H, Szeinberg A, Tabachnik E, Molho M, Benzaray S, et al. (1993) Ethnic differences in lung function in Israeli children. *Thorax* 48: 906-910.
164. Singh R, Singh HJ, Sirisinghe RG (1993) Spirometric studies in Malaysians between 13 and 69 years of age. *Med J Malaysia* 48: 175-184.
165. Higgins MW, Enright PL, Kronmal RA, Schenker MB, Anton-Culver H, et al. (1993) Smoking and lung function in elderly men and women. The Cardiovascular Health Study. *JAMA* 269: 2741-2748.
166. Wang X, Dockery DW, Wypij D, Fay ME, Ferris BG, Jr. (1993) Pulmonary function between 6 and 18 years of age. *Pediatr Pulmonol* 15: 75-88.
167. Azizi BH, Henry RL (1994) Ethnic differences in normal spirometric lung function of Malaysian children. *Respir Med* 88: 349-356.
168. Berman SM, Arnall DA, Cornwall MW (1994) Pulmonary function test outcomes in healthy Navajo Native American adolescents. *Am J Respir Crit Care Med* 150: 1150-1153.
169. Connett GJ, Quak SH, Wong ML, Teo J, Lee BW (1994) Lung function reference values in Singaporean children aged 6-18 years. *Thorax* 49: 901-905.
170. Singh R, Singh HJ, Sirisinghe RG (1994) Spirometric volumes in Malaysian males. *Southeast Asian J Trop Med Public Health* 25: 341-348.
171. Mabrouk AA, Ibrahim SA (1995) Normal values for lung function tests in Sudanese children *East Afr Med J* 72: 258- 262.
172. Udupihille M (1995) Spirometric and flow standards for healthy adult non-smoking Sri Lankans belonging to the Sinhalese ethnic group. *Ann Hum Biol* 22: 321-336.
173. Glindmeyer HW, Lefante JJ, McColloster C, Jones RN, Weill H (1995) Blue-collar normative spirometric values for Caucasian and African-American men and women aged 18 to 65. *Am J Respir Crit Care Med* 151: 412-422.
174. Enright PL, Arnold A, Manolio TA, Kuller LH (1996) Spirometry reference values for healthy elderly blacks. The Cardiovascular Health Study Research Group. *Chest* 110: 1416-1424.
175. Goldin JG, Louw SJ, Joubert G (1996) Spirometry of healthy adult South African men. Part II. Interrelationship between socio-environmental factors and 'race' as determinants of spirometry. *S Afr Med J* 86: 820-826.
176. Louw SJ, Goldin JG, Joubert G (1996) Spirometry of healthy adult South African men. Part I. Normative values. *S Afr Med J* 86: 814-819.
177. Giri BR, Sharma BK, Jindal SK (1996) Normal spirometry in healthy natives of Bhutan. *J Assoc Physicians India* 44: 320-322.
178. Hankinson JL, Kinsley KB, Wagner GR (1996) Comparison of spirometric reference values for Caucasian and African American blue-collar workers. *J Occup Environ Med* 38: 137-143.
179. Sharp DS, Enright PL, Chiu D, Burchfiel CM, Rodriguez BL, et al. (1996) Reference values for pulmonary function tests of Japanese-American men aged 71 to 90 years. *Am J Respir Crit Care Med* 153: 805-811.
180. Quintero C, Bodin L, Andersson K (1996) Reference spirometric values in healthy Nicaraguan male workers. *Am J Ind Med* 29: 41-48.
181. Nair RH, Kesavachandran C, Sanil R, Sreekumar R SS (1997) Prediction equation for lung functions in South Indian children. *Ind J Physio Pharma* 41: 390- 396.

182. Veale AJ, Peat JK, Salome CM, Woolcock AJ, Thompson JE (1997) 'Normal' lung function in rural Australian aborigines. *Aust N Z J Med* 27: 543-549.
183. Pan WH, Chen JY, Haung SL, Liou TL, Lee TK, et al. (1997) Reference spirometric values in healthy Chinese never-smokers in two townships of Taiwan. *Chin J Physiol* 40: 165-174.
184. Rajkappor, Mahajan KK, Mahajan A (1997) Ventilatory lung function tests in school children of 6-13 years. *Indian J Chest Dis Allied Sci* 39: 97-105.
185. Sharma PP, Gupta P, Deshpande R (1997) Lung function values in healthy children (10-15 years). *Indian J Pediatr* 64: 85-91.
186. Bremner PR, de Klerk NH, Ryan GF, James AL, Musk M, et al. (1998) Respiratory symptoms and lung function in aborigines from tropical Western Australia. *Am J Respir Crit Care Med* 158: 1724-1729.
187. Ong TJ, Mehta A, Ogston S, Mukhopadhyay (1998) Prediction of lung function in the inadequately nourished. *Arch Dis Child* 79: 18-21.
188. Lin FL, Kelso JM (1999) Pulmonary function studies in healthy Filipino adults residing in the United States. *J Allergy Clin Immunol* 104: 338-340.
189. Raza SN, Fletcher AM, Pickering CA, Niven RM, Faragher E (1999) Ventilatory function and personal breathing zone dust concentrations in Lancashire textile weavers. *Occup Environ Med* 56: 520-526.
190. Crapo RO, Jensen RL, Oyunchimeg M, Tsh T, DuWayne Schmidt C (1999) Differences in spirometry reference values: a statistical comparison of a Mongolian and a Caucasian study. *Eur Respir J* 13: 606-609.
191. Hankinson JL, Odencrantz JR, Fedan KB (1999) Spirometric reference values from a sample of the general U.S. population. *Am J Respir Crit Care Med* 159: 179-187.
192. Orié NN (1999) Comparison of normal respiratory function values in young Kenyans with those of other Africans and Caucasians. *East Afr Med J* 76: 31-34.
193. Ip MS, Karlberg EM, Karlberg JP, Luk KD, Leong JC (2000) Lung function reference values in Chinese children and adolescents in Hong Kong. I. Spirometric values and comparison with other populations. *Am J Respir Crit Care Med* 162: 424-429.
194. Hnizdo E, Churchyard G, Dowdeswell R (2000) Lung function prediction equations derived from healthy South African gold miners. *Occup Environ Med* 57: 698-705.
195. Joseph CL, Ownby DR, Peterson EL, Johnson CC (2000) Racial differences in physiologic parameters related to asthma among middle-class children. *Chest* 117: 1336-1344.
196. Dejsomritrutai W, Nana A, Maranetra KN, Chuaychoo B, Maneechotesuwan K, et al. (2000) Reference spirometric values for healthy lifetime nonsmokers in Thailand. *J Med Assoc Thai* 83: 457-466.
197. Korotzer B, Ong S, Hansen JE (2000) Ethnic differences in pulmonary function in healthy nonsmoking Asian-Americans and European-Americans. *Am J Respir Crit Care Med* 161: 1101-1108.
198. Vijayan VK, Reetha KV, Kuppurao P, Venkatesan P, Thilakavathy S (2000) Pulmonary function in normal South Indian children aged 7 to 19. *Indian J Chest Dis Allied Sci* 42: 147-156.
199. Harik-Khan RI, Fleg JL, Muller DC, Wise RA (2001) The effect of anthropometric and socioeconomic factors on the racial difference in lung function. *Am J Respir Crit Care Med* 164: 1647-1654.

200. Marion MS, Leonardson GR, Rhoades ER, Welty TK, Enright PL (2001) Spirometry reference values for American Indian adults: results from the Strong Heart Study. *Chest* 120: 489-495.
201. Mukhopadhyay S, Macleod KA, Ong TJ, Ogston SA (2001) "Ethnic" variation in childhood lung function may relate to preventable nutritional deficiency. *Acta Paediatr* 90: 1299-1303.
202. Virani N, Shah B, Celly A (2001) Pulmonary function studies in healthy non-smoking adults in Sri Aurobindo Ashram, Pondicherry. *Indian J Med Res* 114: 177-184.
203. Milivojevic-Poleksic L, Wells AU, Moody A, Fergusson W, Tukuitonga C, et al. (2001) Spirometric lung volumes in the adult Pacific Islander population: comparison with predicted values in a European population. *Respirology* 6: 247-253.
204. Griffith KA, Sherrill DL, Siegel EM, Manolio TA, Bonekat HW, et al. (2001) Predictors of loss of lung function in the elderly: the Cardiovascular Health Study. *Am J Respir Crit Care Med* 163: 61-68.
205. Zverev Y, Gondwe M (2001) Ventilatory capacity indices in Malawian children. *East Afr Med J* 78: 14-18.
206. Verheijden MW, Ton A, James AL, Wood M, Musk AW (2002) Respiratory morbidity and lung function in two Aboriginal communities in Western Australia. *Respirology* 7: 247-253.
207. Havryk AP, Gilbert M, Burgess KR (2002) Spirometry values in Himalayan high altitude residents (Sherpas). *Respir Physiol Neurobiol* 132: 223-232.
208. Boskabady MH, Keshmiri M, Banihashemi B, Anvary K (2002) Lung function values in healthy non-smoking urban adults in Iran. *Respiration* 69: 320-326.
209. Zheng J, Zhong, N (2002) Normative values of pulmonary function testing in Chinese adults, *Chin Med J (Peking)* 2002: 50-54.
210. Golshan M, Nematbakhsh M, Amra B, Crapo RO (2003) Spirometric reference values in a large Middle Eastern population. *Eur Respir J* 22: 529-534.
211. Perez-Padilla R, Regalado-Pineda J, Rojas M, Catalan M, Mendoza L, et al. (2003) Spirometric function in children of Mexico City compared to Mexican-American children. *Pediatr Pulmonol* 35: 177-183.
212. Raju PS, Prasad KV, Ramana YV, Ahmed SK, Murthy KJ (2003) Study on lung function tests and prediction equations in Indian male children. *Indian Pediatr* 40: 705-711.
213. Harik-Khan RI, Muller DC, Wise RA (2004) Racial difference in lung function in African-American and White children: effect of anthropometric, socioeconomic, nutritional, and environmental factors. *Am J Epidemiol* 160: 893-900.
214. Trabelsi Y, Ben Saad H, Tabka Z, Gharbi N, Bouchez Buvry A, et al. (2004) Spirometric reference values in Tunisian children. *Respiration* 71: 511-518.
215. Boskabady MH, Tashakory A, Mazloom R, Ghamami G (2004) Prediction equations for pulmonary function values in healthy young Iranians aged 8-18 years. *Respirology* 9: 535-542.
216. Fulambarker A, Copur AS, Javeri A, Jere S, Cohen ME (2004) Reference values for pulmonary function in Asian Indians living in the United States. *Chest* 126: 1225-1233.
217. Al-Riyami BM, Al-Rawas OA, Hassan MO (2004) Normal spirometric reference values for Omani children and adolescents. *Respirology* 9: 387-391.

218. Whittaker AL, Sutton AJ, Beardsmore CS (2005) Are ethnic differences in lung function explained by chest size? *Arch Dis Child Fetal Neonatal Ed* 90: F423-428.
219. Aggarwal AN, Gupta D, Behera D, Jindal SK (2005) Applicability of commonly used Caucasian prediction equations for spirometry interpretation in India. *Indian J Med Res* 122: 153-164.
220. Sylvester KP, Milligan P, Patey RA, Rafferty GF, Greenough A (2005) Lung volumes in healthy Afro-Caribbean children aged 4-17 years. *Pediatr Pulmonol* 40: 109-112.
221. Krause TG, Pedersen BV, Thomsen SF, Koch A, Wohlfahrt J, et al. (2005) Lung function in Greenlandic and Danish children and adolescents. *Respir Med* 99: 363-371.
222. Ahmadi N, Khamnei S, Abedinzadeh M, Najafi H, Mohammadi M (2006) Lung function reference values in Iranian adolescents. *East Mediterr Health J* 12: 834-839.
223. Ip MS, Ko FW, Lau AC, Yu WC, Tang KS, et al. (2006) Updated spirometric reference values for adult Chinese in Hong Kong and implications on clinical utilization. *Chest* 129: 384-392.
224. Memon MA, Sandila MP, Ahmed ST (2007) Spirometric reference values in healthy, non-smoking, urban Pakistani population. *J Pak Med Assoc* 57: 193-195.
225. Greaves IA, Sexton K, Blumenthal MN, Church TR, Adgate JL, et al. (2007) Asthma, atopy, and lung function among racially diverse, poor inner-urban Minneapolis schoolchildren. *Environ Res* 103: 257-266.
226. Whitrow MJ, Harding S (2008) Ethnic differences in adolescent lung function: anthropometric, socioeconomic, and psychosocial factors. *Am J Respir Crit Care Med* 177: 1262-1267.
